# Supplementary material
Source: publisher figshare collection journal article supplement (https://acs.figshare.com/ndownloader/files/9251017)
Supplement: Supplementary file 1 [file 9251017]

**Supporting information for**  
**Carbon Nanotube Thread Electrochemical Cell:**  
**Detection of Heavy Metals**

Daoli Zhao,<sup>†</sup> David Siebold,<sup>‡</sup> Noe T. Alvarez,<sup>‡</sup> Vesselin N. Shanov,<sup>‡</sup>  
and William R. Heineman<sup>†,\*</sup>

<sup>†</sup>Department of Chemistry, University of Cincinnati, Cincinnati, Ohio, 45221-0172, United  
States

<sup>‡</sup>Department of Biomedical, Chemical and Environmental Engineering, University of Cincinnati,  
Cincinnati, OH, 45221-0072, United States

**Corresponding author:**

Email: [William.Heineman@uc.edu](mailto:William.Heineman@uc.edu). Phone: 01-513-556-9210. Fax: 01-513-556-9239.

**Table of Contents**

|                                                                       |     |
|-----------------------------------------------------------------------|-----|
| Supplementary Figures .....                                           | S-2 |
| Figure S-1 Optical images of electroplated Ag on the CNT thread ..... | S-2 |
| Figure S-2 repeatability study on different working electrodes.....   | S-3 |

## Supplementary Figures

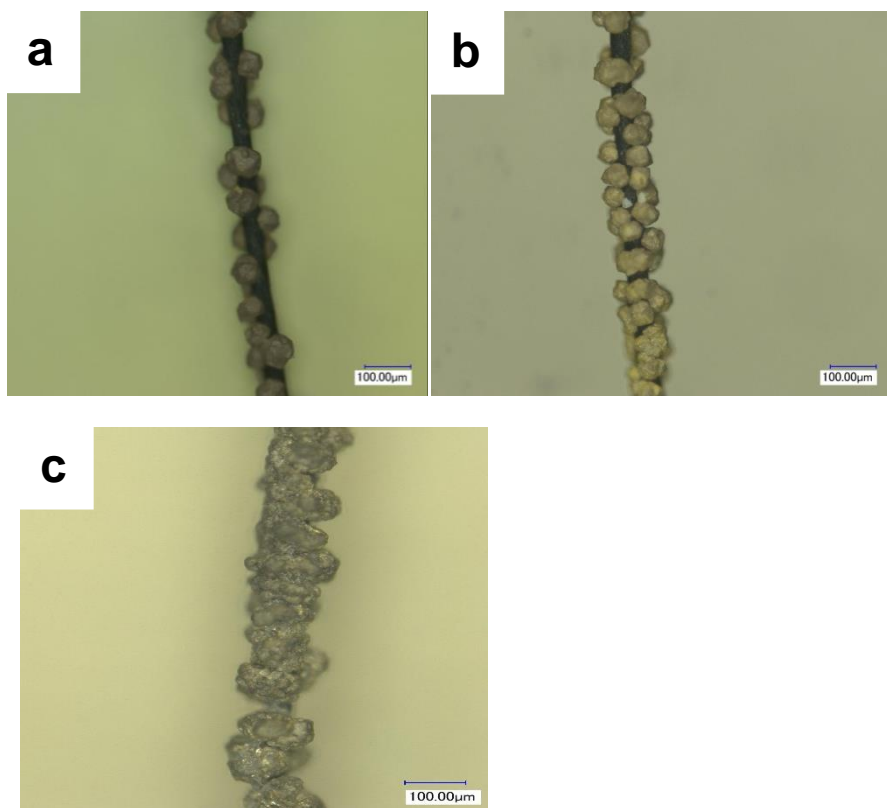

**Figure S-1.** Optical images of electroplated Ag from silver nitrate in aqueous ammonia solution on the CNT thread for (a) 5 min, (b) 10 min and (c) 20 min, then treated with  $\text{FeCl}_3$  for 60 s.

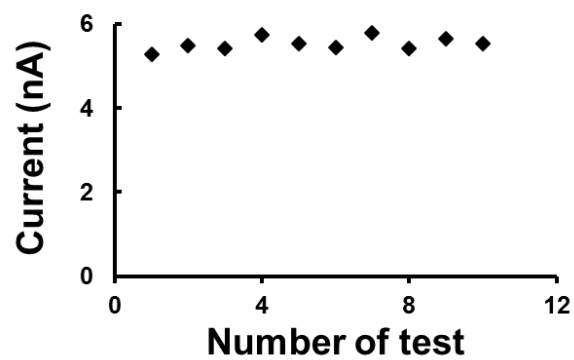

**Figure S-2.** Peak current response at 10 different CNT thread working electrodes for 1.0  $\mu\text{M}$   $\text{Pb}^{2+}$  in acetate buffer with CNT thread electrochemical cell. Accumulation time: 120 s; deposition potential: -1.2 V.
